# Supplementary material for: Minoxidil Promotes Hair Growth through Stimulation of Growth Factor Release from Adipose-Derived Stem Cells
Source: PubMed Central journal article supplement (PMC5877552; doi:10.3390/ijms19030691), 2018-02-28
Supplement: ijms-19-00691-s001.pdf [file ijms-19-00691-s001.pdf]

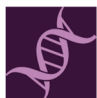

## Supplementary Materials: Minoxidil Promotes Hair Growth through Stimulation of Growth Factor Release from Adipose-Derived Stem Cells

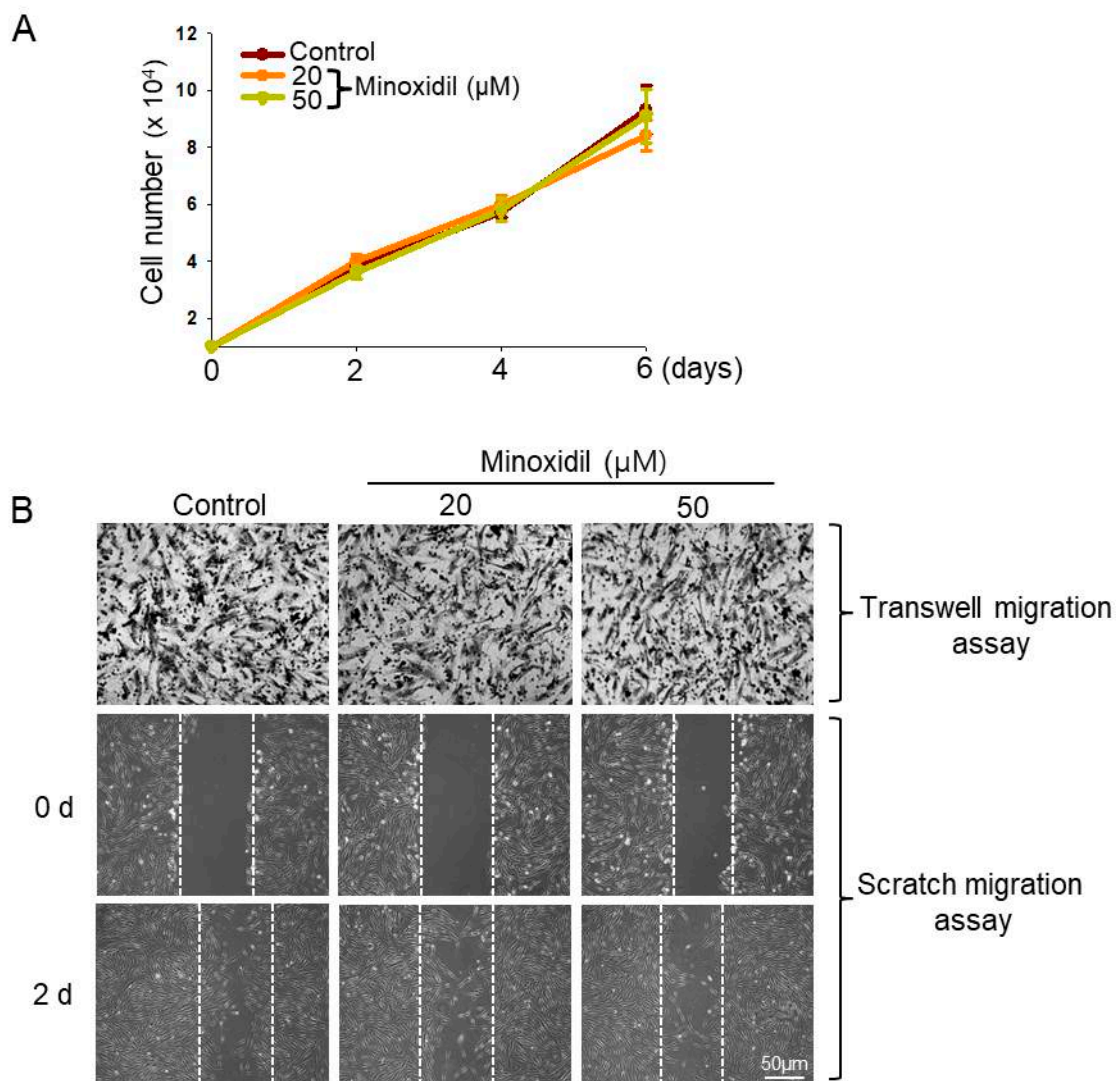

**Figure S1.** Minoxidil doesn't promote hDFs proliferation and migration. No effect of minoxidil on proliferation (A) and migration assay (B) of human dermal fibroblasts.

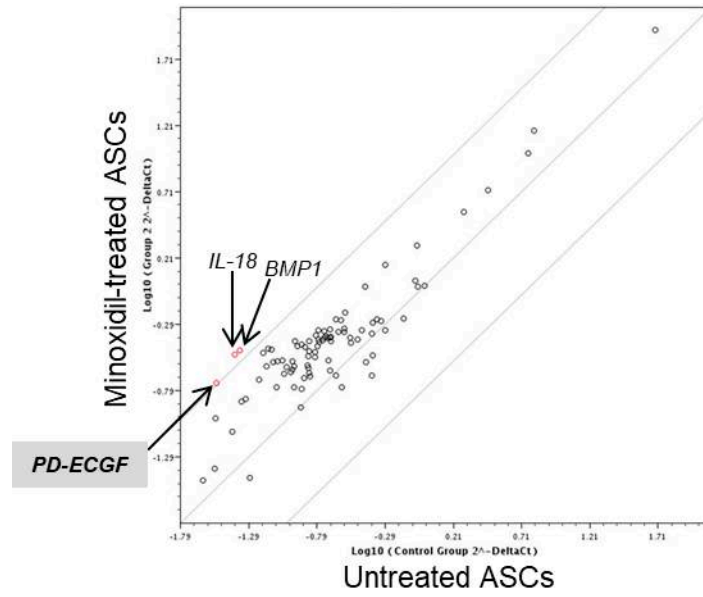

**Figure S2.** QPCR array for growth factors between minoxidil-untreated and -treated ASCs. Upregulation of three growth factors in minoxidil-treated ASCs was analyzed by QPCR array. Gray straight lines indicate  $\pm 2$ -fold change. The three red circles indicate upregulated genes over 2-fold.

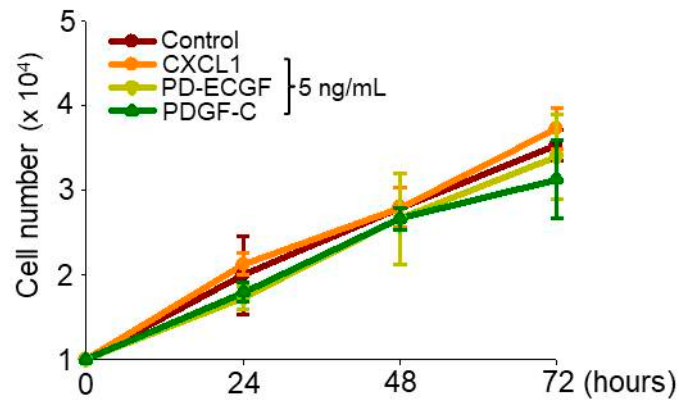

**Figure S3.** CXCL1, PD-ECGF, and PDGF-C doesn't induce proliferation of hDFs. No effect of three proteins (5ng) on proliferation of human dermal fibroblasts.
